# Supplementary material for: Deficiency of Phosphoinositide 3-Kinase Enhancer Protects Mice From Diet-Induced Obesity and Insulin Resistance
Source: Oxford University Press journal article supplement (doi:10.2337/db09-1404), 2010-01-12

## DETAIL EXPERIMENTAL PROCEDURES

### *Generation of knockout animals and genotyping*

Heterozygous *PIKE*<sup>-/-</sup> C57BL/6 mice with a targeted deletion of exon 3 to 6 of *CENTG1* were generated under contract by Ozgene (Australia). Genotyping of offspring was performed by PCR using genomic DNA isolated from the tail tip. Tail samples were digested overnight in lysis solution (0.4X SSC, 10mM Tris pH7.5, 1mM EDTA, 1% SDS and 0.5mg/ml protease K). Genomic DNA was then purified by ethanol precipitation. PCR was performed using a combination of primer D (5'ACAGGATCAGTGCATCATCTC3'), H (5'CTGCCCAGCTACAGGAGTAG3'), primer A (5'TCAGTTGACTGGAAGCTCTG3') and C (5'CCAGAGCCTATCTATGCCTAG3').

### *Immunoprecipitation and Western blotting*

Tissue extracts were prepared by homogenizing the tissues in buffer as reported (1). Cell debris was removed by centrifugation and the supernatants were collected. Immunoprecipitation using antibodies as indicated was performed as reported (1). Antibodies used in the Western blot analysis were obtained from SantaCruz Biotechnology, USA (IR, Akt) and Cell Signaling Technology, USA (anti-phosphor-Thr<sup>308</sup> of Akt and, anti-phosphor-Thr<sup>172</sup> of AMPK, anti-phosphor-Ser<sup>79</sup> of ACC, anti-AMPK $\alpha$  and anti-ACC).

### *Southern blot analysis*

Genomic DNA was extracted from mouse tail as described above, digested with *Nhe* I and size separated on an agarose gel followed by capillary transfer to a Hybond N+ nylon membrane (Amersham Biosciences, USA). Hybridization using 50 ng  $\alpha$ -<sup>32</sup>P-dCTP (10mCi/ml, Amersham Biosciences, USA) labeled 5' probe was performed as previously described (2).

### *Analytical procedures*

All animal experiments were performed according to the care of experimental animal guidelines from Emory University. Twelve-week-old female mice were fed with chow or HFD (Research Diets Inc, USA) for 20 weeks. Blood glucose level was measured using whole blood collected from tail vein by ACCU-CHEK Advantage Blood Glucose Meter (F. Hoffmann-La Roche Ltd., Switzerland). Serum insulin was measured by ELISA (Crystal Chem Inc., USA). Serum triglyceride levels were measured by Serum Triglyceride Determination Kit (Sigma-Aldrich, USA). Serum TNF $\alpha$  was measured by ELISA (BD Biosciences, USA). Glucose tolerance tested was performed on female mice fasted for overnight. Blood sample was collected from tail vein immediately before peritoneal injection of 200  $\mu$ l D-glucose (2g/kg of body weight) or PBS. Blood was sampled at indicated time interval and glucose concentration was measured using ACCU-CHEK Advantage Blood Glucose Meter.

### *Adipocyte differentiation assay*

Adipocyte differentiation assay from MEF was performed under isobutylmethylxanthine/dexamethasone/insulin (MDI) induction as reported (3). MEF were grown to 2 days post-confluence in DMEM with 10% bovine serum. Cells were then induced to differentiate by changing the medium to DMEM containing a standard induction cocktail of 10% FBS, 0.5 mM 3-isobutyl-1-methylxanthine, 1  $\mu$ M dexamethasone, and 1.7  $\mu$ M insulin. After 48 h, this medium was replaced with DMEM supplemented with 10% FBS and 1.7  $\mu$ M insulin, and cells were maintained in this medium for additional 48 h. Lipid accumulation was examined by

oil red O staining, followed by extraction of the absorbed dye with 100% isopropanol and measurement of the OD490 as reported (4).

### ***In vivo insulin stimulation***

Experiments were performed in female mice fasted for 16 hr. Animals were anesthetized by intraperitoneal administration of sodium pentobarbital (50mg/kg of body weight). Saline or 5U human insulin (Elli Lilly, USA) was injected through inferior vena cava. After 5 min, liver, hindlimb muscles and inguinal fat were removed and frozen in liquid nitrogen.

### ***PI3K assay***

*In vitro* PI3K assay were performed using anti-p110 $\alpha$  (SantaCruz Biotechnology, USA) as described previously (5).

### ***RT-PCR***

Total RNA from was prepared by using Trizol Isolation Reagent (Invitrogen, USA). First-strand cDNA from 5 $\mu$ g total RNA was synthesized using Superscript III reverse transcriptase (Invitrogen, USA) and Oligo-dT17 as primer with recommended procedures. Amplification of Pref-1, aP2, PPAR $\gamma$ , and C/EBP $\alpha$  were performed using the following primers: mPref1-F (5'-GACCCACCCCTGTGACCCC-3'), mPref1-R (5'-CAGGCAGCTCGTGCACCCC-3');,maP2-F (5'-CAAAATGTGTGATGCCTTTGTG-3'), maP2-R (5'-CTCTTCCTTTGGCTCATGCC-3'), mPPAR $\gamma$ -F (5'-ATGCTGTTATGGGTGAAACT-3'), mPPAR $\gamma$ -R (5'-CTTGGAGCTTCAGGTCATATTTGTA-3'), mC/EBP $\alpha$ -F (5'-ATCCCAGAGGGACTGGAGTT-3'), mC/EBP $\alpha$ -R (5'-AAGTCTTAGCCGGAGGAAGC-3'). Expression of PIKE-A was determined using primers D and H as described in the genotyping assay. GAPDH fragment was also amplified as internal standard using primers 5'-CGCATCTTCTTGTGCAGTGCC-3' (forward) and 5'-GGCCTTGACTGTGCCGTTGAATTT-3' (reverse). PCR product was quantitated by computer software ImageJ (NIH, USA). A kinetic profile of the amount of PCR product generated at different PCR cycles was constructed and the cycle number used for individual gene expression study was chosen within the exponential region of the amplification curve. This is to ensure that the amount of the PCR product reflects the amount of template in the original sample.

### ***In vitro 2-deoxyglucose uptake***

*In vitro* 2-deoxyglucose uptake in soleus muscle and inguinal fat pad were performed in the presence or absence of human insulin (Elli Lilly, USA) as reported previously (6). Briefly, soleus muscles and inguinal fat pad were pre-incubated in Krebs-Ringer bicarbonate buffer (KRBB) containing 8 mM glucose for 20 min at 37 °C. The tissues were then transferred to KRBB containing 8 mM glucose, 2 mCi/ml 2-<sup>3</sup>H-deoxyglucose and 0.3 mCi of <sup>14</sup>C-mammitol with or without 10mU/ml insulin for 30 min at 37 °C. After incubation, the tissues were blotted, frozen and dissolved in 1 M KOH. After neutralization by 1 M HCl, the samples were measured by scintillation counting.

### ***Fatty acid oxidation assay***

Fatty acid oxidation was measured by determining the production of <sup>3</sup>H<sub>2</sub>O from [9,10-<sup>3</sup>H]palmitate as reported (7). Briefly, hepatocytes and muscle cells isolated from 3-month-old mice were plated (0.5 X 10<sup>5</sup> cell per well) in a 12-well plate and allowed to growth for 6 days.

On the day of experiment, albumin-bound tritiated palmitate was added and incubated for 2 h at 37 °C. After incubation, the medium was removed and added to a tube containing cold 10% trichloroacetic acid. The supernatant was then neutralized with NaOH, applied to ion-exchange resin to separate the  $^3\text{H}_2\text{O}$  and counted by scintillation counting.

### ***Hyperinsulinemic-euglycemic clamp and metabolic cage studies.***

*In vivo* glucose metabolisms including glucose infusion rate, glucose turnover rate and glycogen synthesis were determined by hyperinsulinemic-euglycemic clamp as reported previously (8). Metabolic cages studies were performed using the TSE Systems (Bad Homburg, Germany) (9).

### ***Statistical analysis***

Results were expressed as mean  $\pm$  S.E.M. and were considered significant when  $P < 0.05$ . Statistic analysis of the data were performed using either Student's *t*-test, one-way ANOVA or two-way ANOVA followed by Tukey's multiple comparison test or Bonferroni post-tests by the computer program GraphPad Prism (GraphPad Software, USA).

## **REFERENCES**

1. Ye K, Compton DA, Lai MM, Walensky LD, Snyder SH: Protein 4.1N binding to nuclear mitotic apparatus protein in PC12 cells mediates the antiproliferative actions of nerve growth factor. *J Neurosci* 19:10747-10756, 1999
2. Chan CB, Cheng CH: Identification and functional characterization of two alternatively spliced growth hormone secretagogue receptor transcripts from the pituitary of black seabream *Acanthopagrus schlegelii*. *Mol Cell Endocrinol* 214:81-95, 2004
3. Floyd ZE, Stephens JM: STAT5A promotes adipogenesis in nonprecursor cells and associates with the glucocorticoid receptor during adipocyte differentiation. *Diabetes* 52:308-314, 2003
4. Zhang L, Baker G, Janus D, Paddon CA, Fuhrer D, Ludgate M: Biological effects of thyrotropin receptor activation on human orbital preadipocytes. *Invest Ophthalmol Vis Sci* 47:5197-5203, 2006
5. Ye K, Hurt KJ, Wu FY, Fang M, Luo HR, Hong JJ, Blackshaw S, Ferris CD, Snyder SH: Pike. A nuclear gtpase that enhances PI3kinase activity and is regulated by protein 4.1N. *Cell* 103:919-930, 2000
6. Chang PY, Jensen J, Printz RL, Granner DK, Ivy JL, Moller DE: Overexpression of hexokinase II in transgenic mice. Evidence that increased phosphorylation augments muscle glucose uptake. *J Biol Chem* 271:14834-14839, 1996
7. An JJ, Rhee Y, Kim SH, Kim DM, Han DH, Hwang JH, Jin YJ, Cha BS, Baik JH, Lee WT, Lim SK: Peripheral effect of alpha-melanocyte-stimulating hormone on fatty acid oxidation in skeletal muscle. *J Biol Chem* 282:2862-2870, 2007
8. Kim HJ, Higashimori T, Park SY, Choi H, Dong J, Kim YJ, Noh HL, Cho YR, Cline G, Kim YB, Kim JK: Differential effects of interleukin-6 and -10 on skeletal muscle and liver insulin action in vivo. *Diabetes* 53:1060-1067, 2004
9. Hong EG, Jung DY, Ko HJ, Zhang Z, Ma Z, Jun JY, Kim JH, Sumner AD, Vary TC, Gardner TW, Bronson SK, Kim JK: Nonobese, insulin-deficient Ins2Akita mice develop type 2 diabetes phenotypes including insulin resistance and cardiac remodeling. *Am J Physiol Endocrinol Metab* 293:E1687-1696, 2007

## SUPPLEMENTAL FIGURES

### Supplemental Figure 1. Enhanced systemic insulin sensitivity in *PIKE*<sup>-/-</sup> mice.

- (A) Circulating insulin concentration in mice (8 to 9-month-old) that have been fed with chow or HFD for 20 weeks during the glucose tolerance test. Results were expressed as mean  $\pm$  S.E.M. (n=7; \*\*: P<0.01; vs the same genotype; two-way ANOVA).
- (B) Glucose turnover rate in wild-type (+/+) and knockout (-/-) mice (8 to 9-month-old) that have been fed with chow or HFD for 20 weeks during the hyperinsulinemic-euglycemic clamp experiment. Results were expressed as mean  $\pm$  S.E.M. (n=9; \*\*: P<0.01 vs the same diet; c: P<0.001 vs the same genotype; one-way ANOVA).
- (C) Whole body glycogen synthesis in wild-type (+/+) and knockout (-/-) mice (8 to 9-month-old) that have been fed with chow or HFD for 20 weeks during the hyperinsulinemic-euglycemic clamp experiment. Results were expressed as mean  $\pm$  S.E.M. (n=9; \*: P<0.05, \*\*: P<0.01 vs the same diet; c: P<0.001 vs the same genotype; one-way ANOVA).
- (D) Hepatic glucose output in wild-type (+/+) and knockout (-/-) mice (8 to 9-month-old) that have been fed with HFD for 20 weeks during hyperinsulinemic-euglycemic clamp experiment. Values are the mean  $\pm$  S.E.M. (\*\*\*: P<0.01 vs the same genotype, One-way ANOVA, n=6).

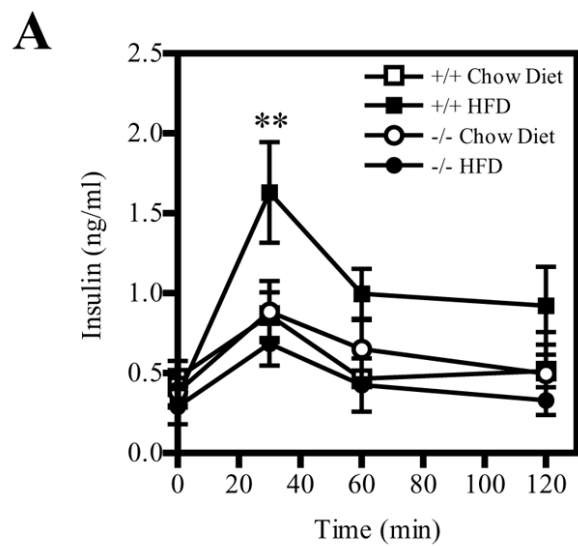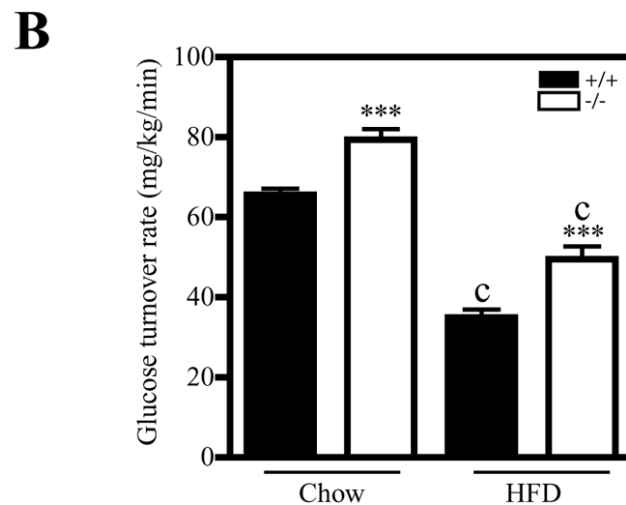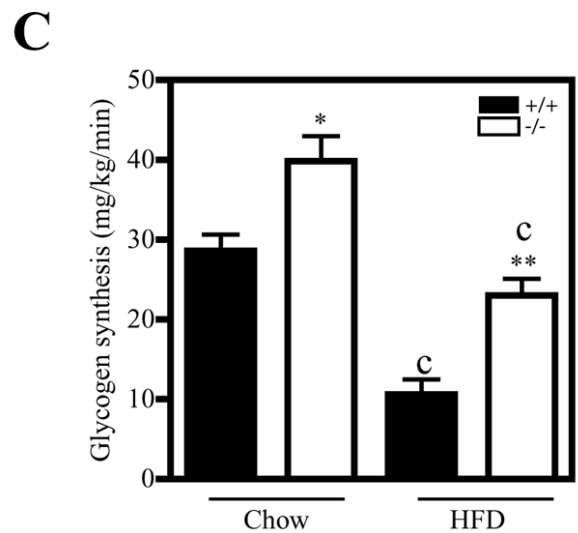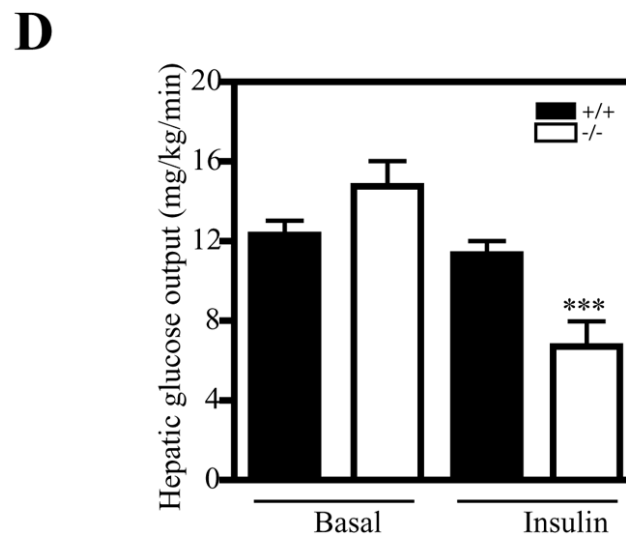

## Supplemental Figure 2 PIKE-A preferentially interacts with Akt1 and 3.

- (A) PIKE-A interacts differentially with Akt1 and Akt3. HEK293 cells were co-transfected with mGST-PIKE-A and different GFP-Akt isoforms. The GST proteins were then pulled down by glutathione beads and the associated Akt proteins were detected by using anti-GFP antibody (1st and 2nd panels). The expression of various GFP-tagged proteins (3rd and 4th panels) and GST-tagged PIKE-A (5th panel) were also examined.
- (B) Ratio of brain weight to total body weights. Brain of 3-month-old wild-type (+/+) and *PIKE*<sup>-/-</sup> (-/-) mice (n=5) were collected, measured and expressed against the corresponding body weight. Results are expressed as mean  $\pm$  S.E.M (\*\*: P<0.01, Student's t-test).

**A**

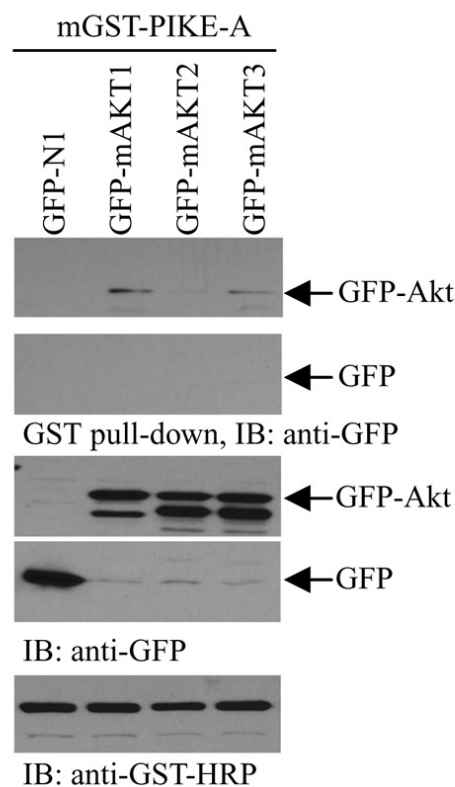

**B**

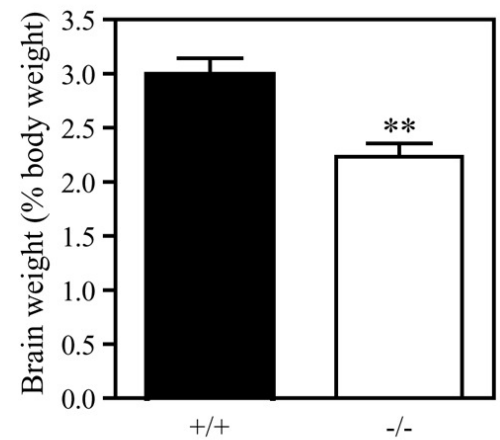

**Supplemental Figure 3      PIKE-A ablation does not alter the AMPK and ACC phosphorylation in hypothalamus and MEF.**

- (A) Analysis of ACC and AMPK phosphorylations in wild-type (+/+) and knockout (-/-) mice (8 to 9-month-old) that have been fed with chow or HFD for 20 weeks. Hypothalamic extracts were prepared and immunoblotted with phosphor-Thr172-AMPK, phosphor-Ser79-ACC, total AMPK and ACC antibodies.
- (B) Analysis of ACC and AMPK phosphorylations in wild-type (+/+) and knockout (-/-) MEF. Cell extracts were prepared and immunoblotted with phosphor-Thr172-AMPK, phosphor-Ser79-ACC, total AMPK and ACC antibodies.

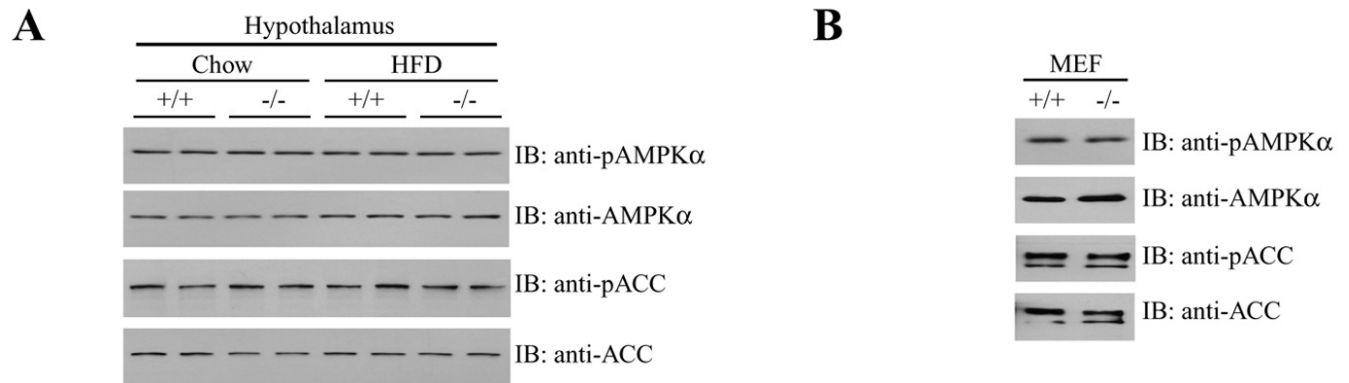

Supplement: db09-1404_online_appendix.pdf [file db09-1404_online_appendix.pdf]
